# Supplementary material for: A facile protocol for the immobilisation of vesicles, virus particles, bacteria, and yeast cells
Source: Royal Society of Chemistry journal article supplement (doi:10.1039/c2ib20181j), 2012-01-01
Supplement: c2ib20181j.pdf [file c2ib20181j.pdf]

## Supplementary Information

# A FACILE PROTOCOL FOR THE IMMOBILISATION OF VESICLES, VIRUS PARTICLES, BACTERIA, AND YEAST CELLS

*Phillip Kuhn<sup>1</sup>, Klaus Eyer<sup>1</sup>, Tom Robinson<sup>1</sup>, Florian I. Schmidt<sup>2</sup>, Jason Mercer<sup>2</sup>, Petra S.*

*Dittrich<sup>\*1</sup>*

*<sup>1</sup>Department of Chemistry and Applied Biosciences, ETH Zurich, CH-8093 Zurich*

*(Switzerland)*

*<sup>2</sup> Institute of Biochemistry, ETH Zurich, CH-8093 Zurich (Switzerland)*

*\*Corresponding author:*

*Petra S. Dittrich*

*ETH Zurich, Department of Chemistry and Applied Biosciences*

*Wolfgang-Pauli-Str. 10*

*CH-8093 Zurich/Switzerland*

*e-mail: [dittrich@org.chem.ethz.ch](mailto:dittrich@org.chem.ethz.ch)*

*Phone: +41 44 633 68 93*

*FAX: +41 44 632 12 92*

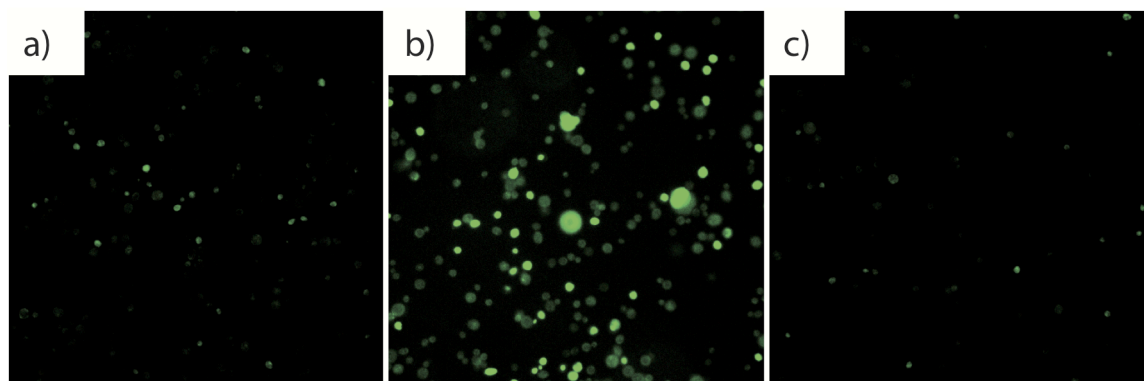

**SI Figure 1: Staining of yeast cell membranes.** Yeast cells were incubated for 90 min at room temperature with a) PBS, b) 5  $\mu$ M cholesterol-PEG-FITC in PBS and c) 5  $\mu$ M fluorescein in PBS. Images show cells after 3 washing steps with PBS. Only the yeast cells incubated with the tagged cholesterol exhibit a higher fluorescence than the autofluorescence of yeast cells.

**SI Movie 1:** GUVs immobilized in the presence of flow ( $\sim 60 \mu\text{m/s}$ ) in the microfluidic chamber. Confocal images of DiI in the membrane were recorded every 150 ms. The movie play back speed is increased 3 times.

**SI Movie 2:** *E. coli* (expressing GFP) immobilized in a microfluidic device as described in the main text. Bacteria cells could not be washed away with high flow rates of 200  $\mu\text{l/min}$ . The channel was 2 mm by 100  $\mu\text{m}$  in this experiment. Non-tethered *E. coli* visualise the flow.
